# Supplementary material
Source: PubMed Central journal article supplement (PMC2650632)
Supplement: dsm034_1.pdf [file dsm034_1.pdf]

## Section 1: Input Datasets

*Ceanorhabditis elegans* pharyngeal muscle expressed gene dataset

| Gene Public Name | Sequence Name | Comment                                                                                                                |
|------------------|---------------|------------------------------------------------------------------------------------------------------------------------|
| unc-89           | C09D1.1       | UNCoordinated, encodes a Ca <sup>2+</sup> /calmodulin dependent protein kinase                                         |
| sma-6            | C32D5.2       | Encodes a serine/threonine proteine kinase                                                                             |
| hen-1            | C36B7.7       | HEsitationN behaviour, encodes a secretory protein affecting integration of sensory stimuli and behavioral plasticity  |
| C49F8.2          | C49F8.2       | -                                                                                                                      |
| exp-2            | F12F3.1       | EXPulsion defective, encodes a member of a family of potassium channels required for normal feeding behavior           |
| mkk-4            | F42G10.2      | MAP Kinase Kinase homolog, required in presynaptic neurons                                                             |
| nucb-1           | F44A6.1       | NUCLEoBindin homolog                                                                                                   |
| dyb-1            | F47G6.1       | DYstroBrevin homolog                                                                                                   |
| gas-1            | K09A9.5       | General Anaesthetic Sensitivity abnormal, encodes a subunit of mitochondrial complex I                                 |
| rga-3            | K09H11.3      | Rho GTPase Activating protein                                                                                          |
| unc-68           | K11C4.5       | UNCoordinated, encodes a ryanodine receptor ortholog                                                                   |
| egl-30           | M01D7.7       | Egg Laying defective, encodes an ortholog of the G protein alpha subunit Gq                                            |
| nud-2            | R11A5.2       | Aspergillus Nuclear Division related, encodes an ortholog of human NDE1 and NDEL1                                      |
| ric-3            | T14A8.1       | Resistance to Inhibitors of Cholinesterase, necessary for the function of at least 4 nicotinic acetylcholine receptors |
| myo-2            | T18D3.4       | MYOsin heavy chain structural class, encodes a muscle-type specific myosin heavy chain isoform                         |
| tni-4            | W03F8.1       | TropoNin I, encodes a troponin I protein                                                                               |
| ctl-3            | Y54G11A.13    | CaTaLase, encodes one of three <i>C. elegans</i> catalases                                                             |
| cua-1            | Y76A2A.2      | CU (copper) ATPase, a cation transport ATPase                                                                          |
| unc-52           | ZC101.2       | UNCoordinated, encodes prelecan, orthologous to human HSPG2                                                            |
| obr-3            | ZK1086.1      | Oxysterol Binding protein Related                                                                                      |

*Ciona intestinalis* muscle dataset specific gene dataset

| Gene name | Ensembl Transcript ID | Comment                         |
|-----------|-----------------------|---------------------------------|
| Ci-TnC2   | ENSCINT00000012854    | Troponin C 2                    |
| Ci-MA5    | ENSCINT00000002686    | Muscle Actin 5                  |
| Ci-MA4    | ENSCINT00000014519    | Muscle Actin 4                  |
| Ci-MA1    | ENSCINT00000015480    | Muscle Actin 1                  |
| Ci-MRLC4  | ENSCINT00000014813    | Myosin Regulatory Light Chain 4 |
| Ci-MRLC3  | ENSCINT00000024572    | Myosin Regulatory Light Chain 3 |
| Ci-MRLC2  | ENSCINT00000005614    | Myosin Regulatory Light Chain 2 |
| Ci-MA2    | ENSCINT00000004215    | Muscle Actin 2                  |
| Ci-TnT    | ENSCINT00000010963    | Troponin T                      |
| Ci-TPM1   | ENSCINT00000004783    | Tropomyosin 1                   |
| Ci-TPM2   | ENSCINT00000009059    | Tropomyosin 2                   |
| Ci-TPM3   | ENSCINT00000008881    | Tropomyosin 3                   |
| Ci-MLC2   | ENSCINT00000009951    | Myosin Light Chain 2            |
| Ci-MLC3   | ENSCINT00000009959    | Myosin Light Chain 3            |
| Ci-MLC4   | ENSCINT00000009977    | Myosin Light Chain 4            |
| Ci-MHC2   | ENSCINT00000002395    | Myosin Heavy Chain 2            |
| Ci-MHC4   | ENSCINT00000019909    | Myosin Heavy Chain 4            |
| Ci-MHC5   | ENSCINT00000019346    | Myosin Heavy Chain 5            |
| Ci-MHC6   | ENSCINT00000019915    | Myosin Heavy Chain 6            |

## Section 2: Motif Prediction Parameters

For both datasets 4 sequence sets were made. They consist of:

- 1 the first 500 bases upstream of the translation start site of each gene
- 2 the first 1000 bases upstream of the translation start site of each gene
- 3 the 2000 bases upstream of position -1000 relative to the translation start site of each gene
- 4 the entire sequence (3000 bases) upstream of each gene.

On each of these 4 sets three motif prediction programs were applied.

For MEME<sup>1</sup> motifs were predicted using the mode allowing any number of sites for a motif in each sequence. Only motifs with at least 5 predicted sites, and with a width of 6 to 15 base pairs were investigated. Different runs were done considering only one strand, and considering both strands. A background model based on the genome wide set of promoter sequences was used to model oligonucleotide frequencies. A more detailed description can be found in the MEME manual.

For Weeder<sup>2</sup> motifs were predicted using the “medium” analysis type, which evaluates motifs of lengths 6, 8, and 10 base pairs allowing up to 3 mutations. The 10 highest-scoring motifs of each run are saved, and for each motif any number of sites per sequence was allowed. Different runs were done considering only one strand, and considering both strands. A background model based on the genome wide set of promoter sequences was used to model oligonucleotide frequencies.

For AlignACE<sup>3</sup> motifs were predicted using standard parameter settings. The GC content of the input sequences was used as background model.

The top 10 motifs of each run for each program are collected, and a variable order Bayesian network model was made for each motif based on the sites reported by the prediction programs. Subsequently, the group specificity as described by Hughes *et al.*<sup>3</sup> was calculated for each motif using the input sequences and a set of 1000 randomly selected promoter sequences from the genomic set of promoter sequences. For the *C. elegans* set the 7 most over-represented motifs, and for *C. intestinalis* the 10 most over-represented motifs were used for further analysis.

## Section 3: Predicted Motifs and Position Dependencies

### Position dependencies in motifs

*C. elegans* pharyngeal muscle dataset motifs

In this dataset we introduced only one dependency. In motif Cel\_PM5 position 11 has a slight preference for the base T. However, when the base on position 12 is A, position 11 tends to prefer A as well.

*C. intestinalis* muscle dataset motifs

In this dataset we introduced 5 dependencies in 4 motifs.

In motif Cin\_M1, position 2 prefers T, except when position 3 is A position 2 tends to be G.

In motif Cin\_M4, position 8 tends to be A, but when position 9 is C position 8 shows a strong preference for G.

In motif Cin\_M5 we detected 2 dependencies. Position 11 tends to be G but prefers A when position 7 is A. Secondly, position 8 tends to be T but prefers C when position 5 is C.

In motif Cis\_M6, position 7 shows a strong preference for A, but when position 4 is A, position 7 tends to be T.

Of the 6 dependencies we found in total, 3 are between adjacent positions. The other 3 dependencies as well are between relatively proximal base pairs (one for a distance of 2, 3 and 4 bps distance each).

### Motif logos

Below are the motif logos for the motifs used in the *C. elegans* pharyngeal muscle promoter architecture model, and the *C. intestinalis* muscle promoter architecture model. Note that motif logos do not consider dependencies between positions, and thus give an incomplete representation of the motif.

*C. elegans* pharyngeal muscle dataset motif logos

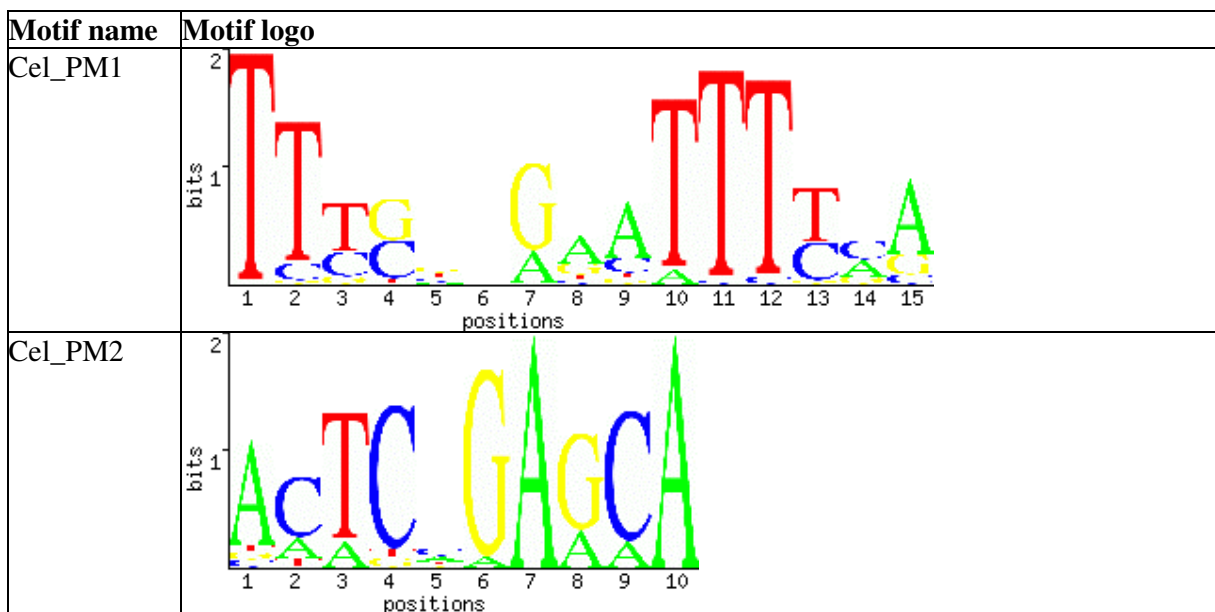

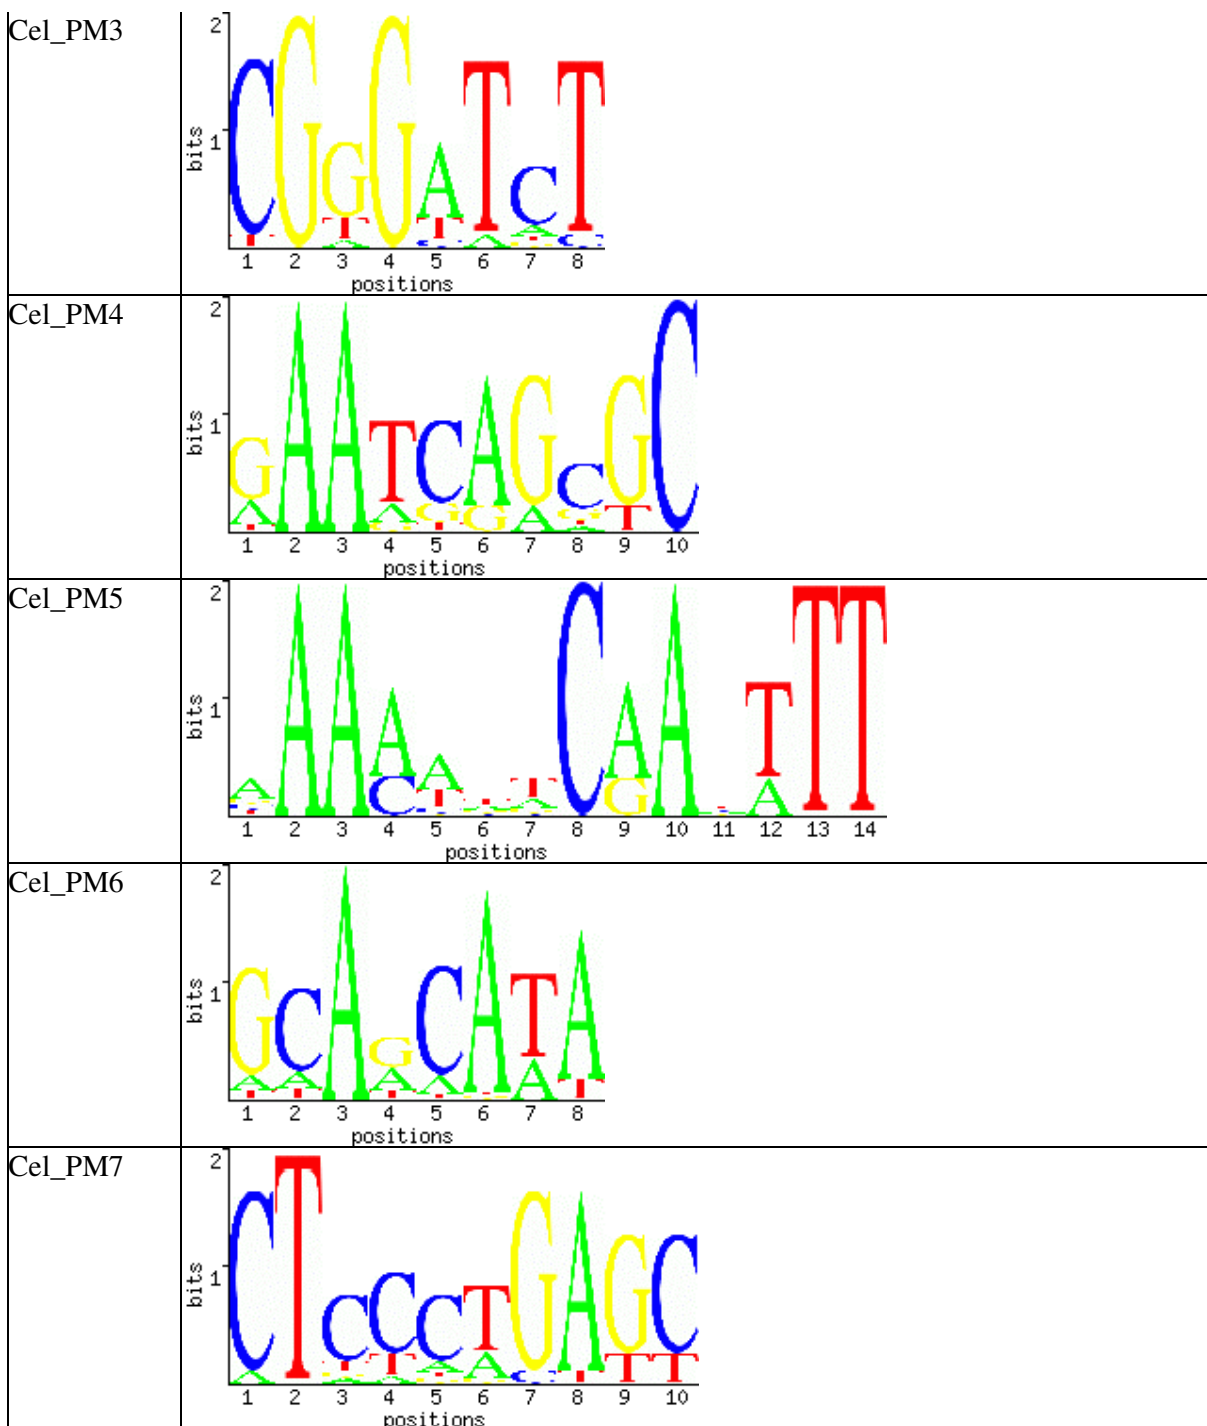

*C. intestinalis* muscle dataset motif logos

| Motif name | Motif logo |
|------------|------------|
|------------|------------|

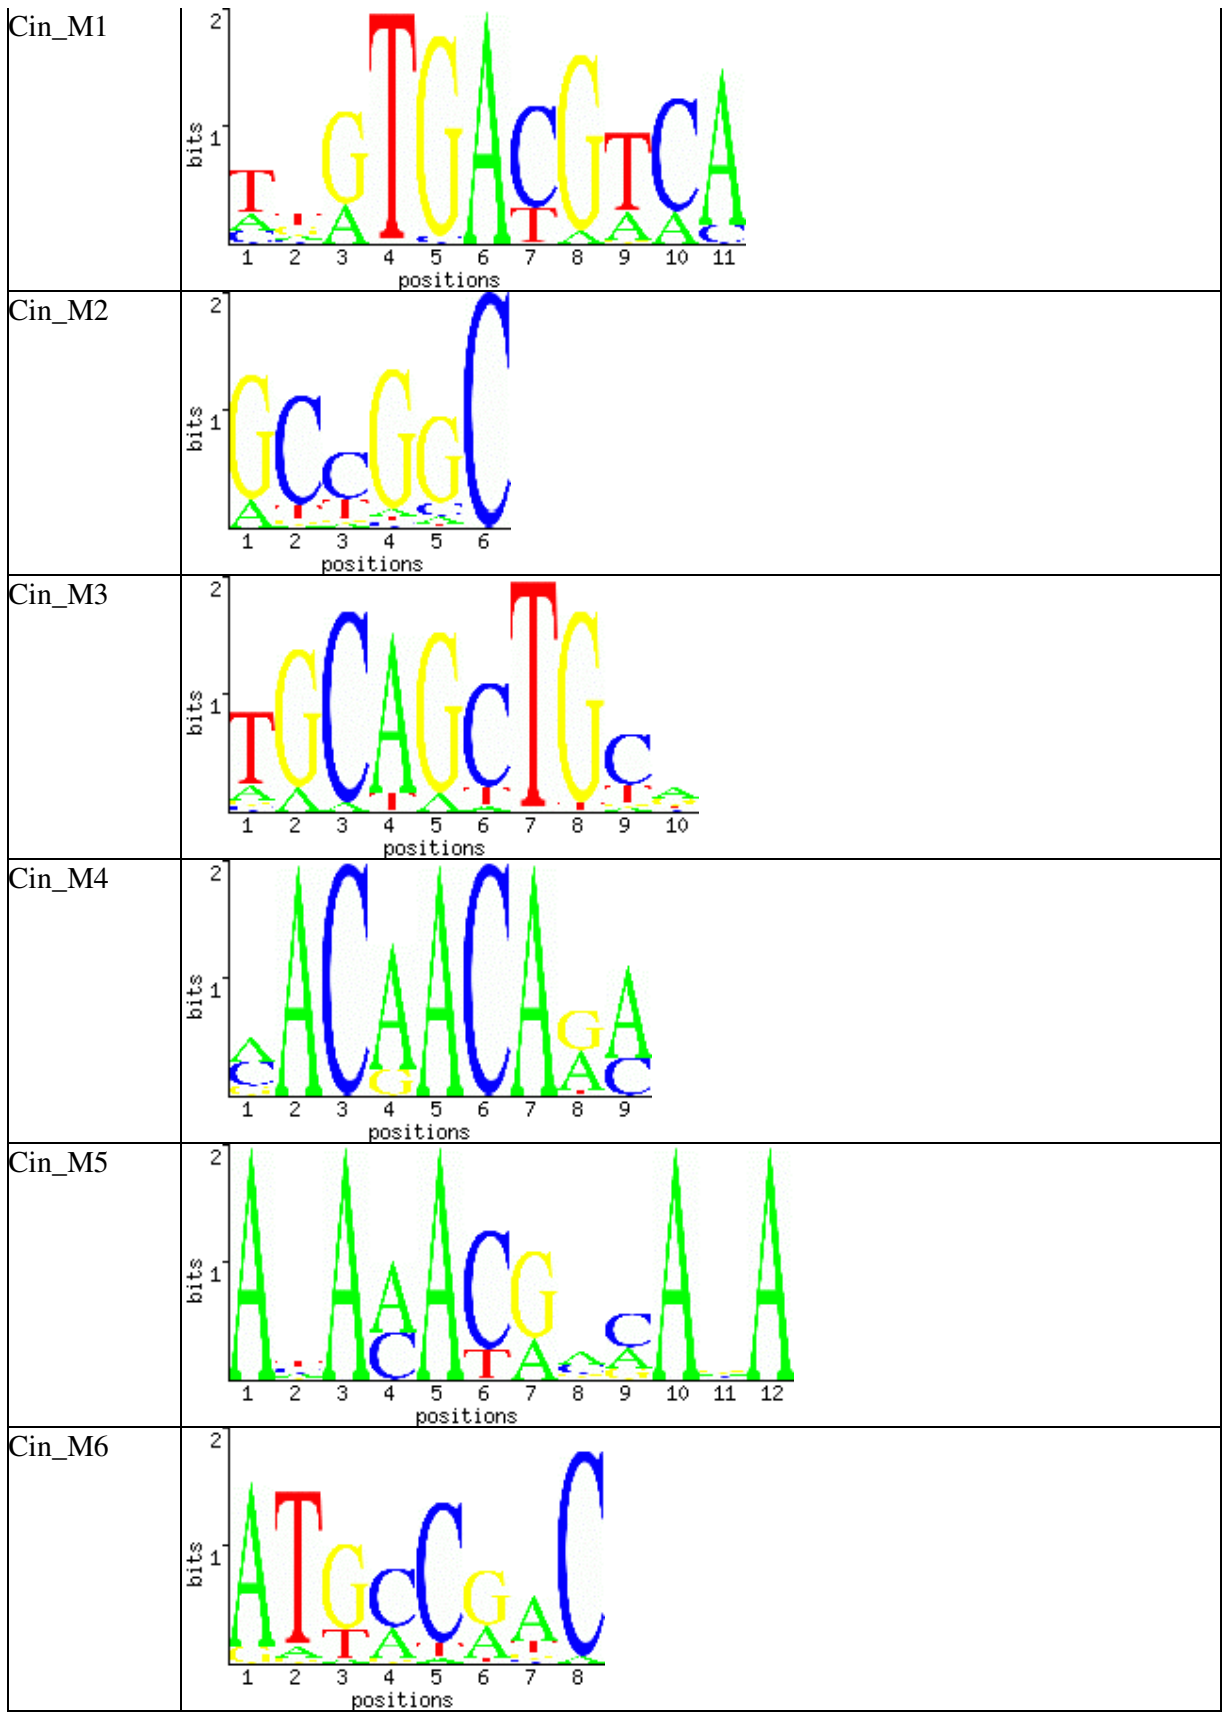

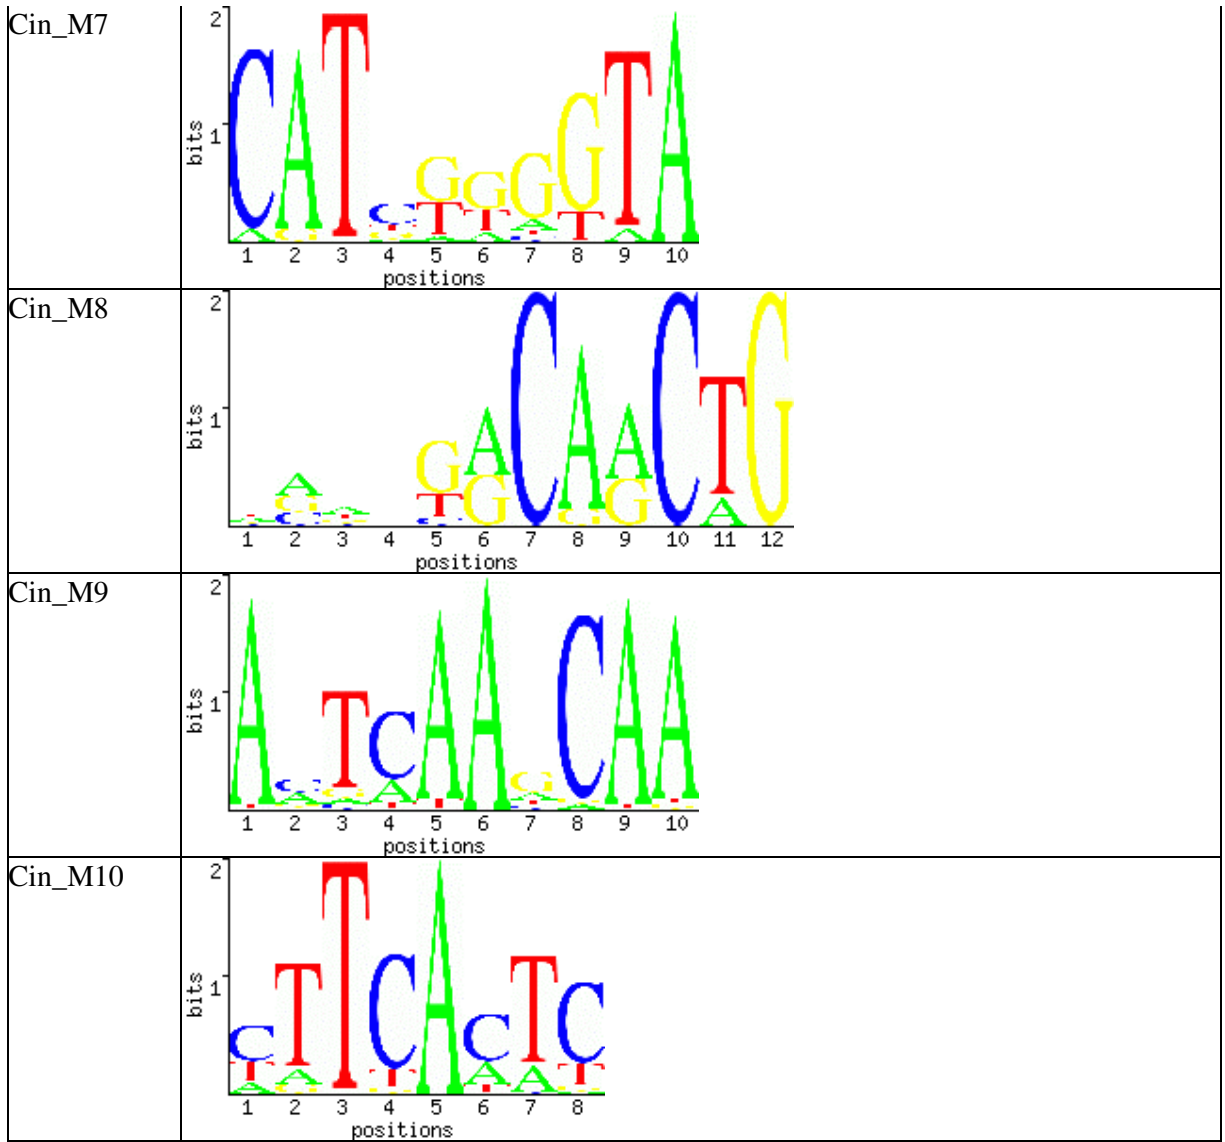

# Section 4: Constructed Promoter Models

Below are the log likelihood ratios (LLRs) for the transitions between motif site pairs, for the proximal and distal regions of both promoter architecture models. The LLR values are calculated as described in the main text. The first column shows the first motif and its orientation, the top row shows the upstream adjacent motif and its orientation. The values in the table are the LLR scores for a transition between the first motif and the adjacent upstream motif. Also, the start and end state of each region is included in these tables.

## C. elegans pharyngeal muscle promoter architecture model

### Proximal region LLR values

|          | Cel_PM3+ | Cel_PM3- | Cel_PM1+ | Cel_PM1- | Cel_PM7+ | Cel_PM7- | Cel_PM4+ | Cel_PM4- | Cel_PM6+ | Cel_PM6- | Cel_PM5+ | Cel_PM5- | Cel_PM2+ | Cel_PM2- | end   |
|----------|----------|----------|----------|----------|----------|----------|----------|----------|----------|----------|----------|----------|----------|----------|-------|
| Cel_PM3+ | 0.09     | 0.33     | 0.22     | -0.20    | 0.55     | 0.02     | 0.00     | 0.08     | 0.04     | 0.07     | -0.05    | 0.21     | 0.13     | 0.40     | -0.94 |
| Cel_PM3- | 0.23     | -0.14    | 0.36     | -0.23    | -0.03    | 0.29     | 0.55     | -0.04    | -0.07    | 0.27     | 0.18     | 0.17     | -0.10    | -0.03    | -0.65 |
| Cel_PM1+ | 0.18     | 0.30     | 0.27     | 0.43     | -0.17    | -0.19    | 0.07     | -0.07    | -0.12    | -0.16    | 0.14     | 0.28     | 0.20     | -0.14    | -0.80 |
| Cel_PM1- | 0.05     | 0.37     | 0.41     | 0.05     | 0.33     | -0.05    | 0.33     | 0.05     | 0.28     | 0.30     | -0.20    | -0.28    | 0.27     | 0.35     | -1.01 |
| Cel_PM7+ | 0.25     | 0.42     | -0.16    | 0.15     | 0.11     | -0.25    | 0.42     | 0.41     | 0.44     | 0.24     | 0.09     | -0.17    | -0.09    | 0.00     | -0.69 |
| Cel_PM7- | 0.07     | 0.08     | 0.51     | -0.15    | 0.27     | -0.06    | 0.02     | 0.09     | 0.16     | 0.40     | 0.05     | 0.08     | 0.05     | 0.21     | -0.82 |
| Cel_PM4+ | 0.27     | 0.25     | 0.12     | 0.20     | 0.14     | -0.12    | 0.00     | -0.07    | 0.25     | 0.15     | 0.13     | 0.18     | 0.36     | 0.16     | -0.58 |
| Cel_PM4- | 0.15     | 0.14     | 0.03     | -0.04    | 0.01     | 0.16     | 0.49     | 0.03     | 0.05     | 0.13     | 0.35     | 0.04     | 0.42     | -0.07    | -0.82 |
| Cel_PM6+ | 0.13     | 0.46     | 0.25     | -0.09    | -0.04    | 0.30     | 0.04     | 0.04     | -0.01    | -0.03    | -0.01    | -0.12    | 0.00     | 0.12     | -0.24 |
| Cel_PM6- | 0.01     | -0.04    | -0.07    | -0.04    | 0.33     | -0.06    | 0.08     | 0.03     | 0.23     | 0.21     | -0.02    | 0.22     | 0.26     | 0.08     | -0.27 |
| Cel_PM5+ | 0.10     | 0.15     | -0.16    | -0.32    | 0.09     | 0.00     | 0.37     | 0.37     | 0.34     | 0.07     | -0.26    | 0.26     | 0.35     | 0.60     | -0.50 |
| Cel_PM5- | 0.08     | 0.12     | -0.19    | -0.23    | 0.35     | -0.01    | 0.49     | 0.01     | 0.28     | 0.32     | -0.05    | 0.09     | 0.34     | 0.44     | -0.48 |
| Cel_PM2+ | 0.58     | 0.42     | 0.37     | 0.14     | -0.30    | 0.24     | 0.02     | 0.05     | 0.03     | -0.02    | 0.21     | -0.06    | -0.04    | -0.08    | -0.48 |
| Cel_PM2- | 0.03     | 0.04     | 0.07     | -0.12    | 0.41     | 0.15     | 0.51     | 0.00     | 0.02     | 0.20     | -0.05    | -0.14    | 0.41     | 0.06     | -0.65 |
| start    | 0.33     | 0.13     | 0.07     | -0.07    | 0.32     | -0.22    | 0.32     | 0.08     | 0.07     | 0.07     | 0.13     | -0.39    | 0.14     | 0.43     | -0.98 |

### Distal region LLR values

|          | Cel_PM3+ | Cel_PM3- | Cel_PM1+ | Cel_PM1- | Cel_PM7+ | Cel_PM7- | Cel_PM4+ | Cel_PM4- | Cel_PM6+ | Cel_PM6- | Cel_PM5+ | Cel_PM5- | Cel_PM2+ | Cel_PM2- | end   |
|----------|----------|----------|----------|----------|----------|----------|----------|----------|----------|----------|----------|----------|----------|----------|-------|
| Cel_PM3+ | 0.45     | 0.53     | 0.23     | 0.38     | 0.04     | 0.10     | 0.14     | 0.36     | 0.19     | 0.25     | 0.30     | 0.30     | 0.43     | 0.40     | -0.87 |
| Cel_PM3- | -0.03    | 0.02     | 0.42     | 0.21     | 0.14     | 0.08     | 0.32     | 0.39     | 0.28     | 0.30     | 0.56     | 0.16     | 0.14     | 0.22     | -0.50 |
| Cel_PM1+ | 0.23     | 0.39     | 0.04     | 0.00     | 0.53     | 0.07     | 0.43     | 0.28     | 0.18     | 0.37     | 0.21     | 0.53     | 0.43     | 0.31     | -0.68 |
| Cel_PM1- | 0.41     | 0.32     | 0.06     | -0.10    | 0.26     | 0.27     | 0.54     | 0.56     | 0.53     | 0.30     | 0.19     | 0.23     | 0.70     | 0.37     | -0.89 |
| Cel_PM7+ | 0.04     | 0.28     | 0.42     | 0.14     | 0.11     | -0.37    | 0.36     | 0.26     | 0.47     | 0.49     | 0.12     | 0.03     | 0.17     | 0.03     | -0.45 |
| Cel_PM7- | 0.30     | 0.40     | 0.07     | 0.36     | 0.28     | -0.03    | 0.30     | 0.54     | 0.44     | 0.31     | 0.46     | 0.24     | 0.34     | -0.02    | -0.89 |
| Cel_PM4+ | 0.29     | 0.48     | 0.14     | -0.01    | 0.17     | 0.04     | 0.29     | 0.42     | 0.48     | 0.40     | 0.55     | 0.15     | 0.17     | 0.27     | -0.63 |
| Cel_PM4- | 0.19     | 0.35     | 0.00     | 0.28     | 0.36     | 0.23     | 0.17     | 0.43     | 0.35     | 0.53     | 0.19     | 0.19     | 0.14     | -0.08    | -0.60 |
| Cel_PM6+ | 0.43     | 0.24     | 0.26     | 0.09     | 0.31     | 0.11     | 0.18     | 0.26     | 0.10     | 0.26     | 0.18     | 0.21     | 0.23     | 0.29     | -0.45 |
| Cel_PM6- | 0.40     | 0.31     | 0.33     | 0.02     | 0.28     | 0.21     | 0.35     | 0.19     | 0.11     | -0.07    | 0.48     | 0.26     | 0.45     | 0.18     | -0.46 |
| Cel_PM5+ | 0.26     | 0.49     | 0.01     | -0.03    | 0.14     | 0.44     | 0.67     | 0.45     | 0.31     | 0.26     | 0.13     | 0.20     | 0.14     | 0.38     | -1.01 |
| Cel_PM5- | 0.15     | 0.44     | 0.30     | 0.05     | 0.23     | 0.09     | 0.58     | 0.28     | 0.14     | 0.38     | -0.18    | 0.20     | 0.25     | 0.30     | -0.53 |
| Cel_PM2+ | 0.41     | 0.39     | 0.13     | 0.33     | 0.02     | 0.43     | 0.07     | 0.31     | 0.33     | 0.43     | 0.20     | 0.22     | 0.41     | 0.07     | -0.85 |
| Cel_PM2- | 0.39     | 0.31     | 0.17     | 0.11     | 0.17     | -0.02    | 0.24     | 0.48     | 0.18     | 0.35     | 0.37     | 0.13     | 0.29     | 0.26     | -0.58 |
| start    | 0.33     | 0.70     | 0.11     | 0.05     | 0.81     | 0.21     | 0.30     | 0.59     | 0.22     | 0.27     | 0.78     | 0.73     | 0.24     | 0.64     | -0.57 |

## C. intestinalis muscle specific promoter model architecture model

### Proximal region LLR values

|          | Cin_M1+ | Cin_M1- | Cin_M2+ | Cin_M2- | Cin_M7+ | Cin_M7- | Cin_M5+ | Cin_M5- | Cin_M10+ | Cin_M10- | Cin_M3+ | Cin_M3- | Cin_M4+ | Cin_M4- | Cin_M9+ | Cin_M9- | Cin_M6+ | Cin_M6- | Cin_M8+ | Cin_M8- | end   |
|----------|---------|---------|---------|---------|---------|---------|---------|---------|----------|----------|---------|---------|---------|---------|---------|---------|---------|---------|---------|---------|-------|
| Cin_M1+  | -0.20   | 0.02    | 0.41    | 0.27    | 0.47    | 0.07    | 0.05    | -0.08   | 0.38     | 0.06     | 0.42    | 0.48    | 0.39    | 0.05    | 0.44    | 0.34    | 0.24    | 0.20    | 0.43    | 0.70    | -0.66 |
| Cin_M1-  | -0.12   | -0.17   | 0.48    | 0.53    | 0.86    | 0.44    | 0.46    | 0.17    | 0.31     | 0.31     | 0.59    | 0.48    | 0.32    | 0.22    | 0.27    | 0.36    | 0.19    | -0.28   | 0.46    | 0.42    | -0.77 |
| Cin_M2+  | 0.11    | -0.04   | -0.07   | 0.41    | 0.29    | 0.36    | 0.40    | 0.15    | 0.62     | 0.32     | 0.34    | 0.54    | 0.11    | 0.34    | 0.29    | 0.34    | 0.54    | 0.36    | 0.46    | 0.19    | -1.08 |
| Cin_M2-  | 0.45    | 0.11    | 0.21    | 0.49    | 0.31    | 0.29    | 0.08    | 0.00    | 0.24     | 0.49     | 0.34    | 0.49    | 0.34    | 0.45    | 0.49    | 0.59    | 0.34    | 0.24    | 0.21    | 0.17    | -1.08 |
| Cin_M7+  | 0.05    | 0.07    | 0.29    | 0.46    | 0.21    | 0.46    | 0.29    | 0.27    | 0.21     | 0.19     | 0.25    | 0.62    | 0.21    | 0.48    | 0.34    | 0.37    | 0.75    | 0.16    | 0.27    | 0.04    | -0.68 |
| Cin_M7-  | 0.27    | 0.25    | 0.39    | 0.42    | 0.22    | 0.25    | 0.20    | 0.17    | 0.35     | 0.44     | 0.44    | 0.33    | 0.50    | 0.53    | 0.50    | 0.20    | 0.42    | 0.39    | 0.17    | 0.31    | -0.80 |
| Cin_M5+  | 0.16    | 0.28    | 0.76    | 0.67    | 0.25    | 0.11    | -0.09   | 0.20    | 0.28     | 0.21     | 0.57    | 0.39    | 0.18    | 0.35    | 0.24    | 0.17    | 0.44    | 0.30    | 0.25    | 0.25    | -0.54 |
| Cin_M5-  | 0.16    | 0.18    | 0.34    | 0.56    | 0.76    | 0.46    | 0.38    | -0.03   | 0.43     | 0.34     | 0.61    | 0.61    | 0.48    | -0.10   | 0.35    | 0.29    | 0.73    | 0.27    | 0.27    | 0.15    | -1.08 |
| Cin_M10+ | 0.54    | 0.35    | 0.25    | 0.71    | 0.14    | 0.14    | 0.35    | -0.09   | 0.46     | 0.05     | 0.30    | 0.30    | 0.09    | 0.08    | 0.53    | 0.21    | 0.44    | 0.38    | 0.54    | 0.23    | -1.22 |
| Cin_M10- | -0.03   | 0.32    | 0.42    | 0.58    | 0.52    | 0.32    | 0.26    | 0.10    | 0.27     | 0.27     | 0.40    | 0.55    | 0.36    | 0.27    | 0.32    | 0.15    | 0.47    | 0.27    | 0.34    | 0.22    | -1.04 |
| Cin_M3+  | 0.23    | 0.38    | 0.46    | 0.76    | 0.43    | 0.35    | 0.29    | 0.01    | 0.61     | 0.35     | 0.13    | 0.40    | 0.35    | 0.49    | 0.40    | 0.23    | 0.35    | 0.91    | -0.29   | 0.21    | -0.72 |
| Cin_M3-  | 0.43    | 0.19    | 0.40    | 0.53    | 0.67    | 0.25    | 0.23    | 0.25    | 0.43     | 0.43     | 0.30    | 0.37    | 0.51    | 0.50    | 0.11    | 0.13    | 0.46    | 0.88    | -0.29   | 0.14    | -0.75 |

|        |      |       |      |      |      |      |       |       |      |       |       |       |       |       |      |      |      |      |       |      |       |
|--------|------|-------|------|------|------|------|-------|-------|------|-------|-------|-------|-------|-------|------|------|------|------|-------|------|-------|
| Cin_M4 | 0.35 | 0.14  | 0.32 | 0.44 | 0.41 | 0.15 | 0.29  | 0.10  | 0.19 | 0.36  | 0.36  | 0.32  | 0.20  | 0.41  | 0.05 | 0.27 | 0.25 | 0.41 | 0.35  | 0.14 | -0.84 |
| +      |      |       |      |      |      |      |       |       |      |       |       |       |       |       |      |      |      |      |       |      |       |
| Cin_M4 | 0.23 | 0.48  | 0.27 | 0.69 | 0.46 | 0.29 | 0.29  | 0.13  | 0.32 | 0.16  | 0.32  | 0.52  | 0.29  | 0.32  | 0.44 | 0.30 | 0.49 | 0.49 | 0.25  | 0.00 | -0.84 |
| +      |      |       |      |      |      |      |       |       |      |       |       |       |       |       |      |      |      |      |       |      |       |
| Cin_M9 | 0.42 | 0.05  | 0.37 | 0.32 | 0.32 | 0.16 | 0.15  | 0.22  | 0.43 | 0.12  | 0.37  | 0.34  | 0.03  | 0.32  | 0.56 | 0.15 | 0.42 | 0.13 | 0.35  | 0.16 | -0.75 |
| +      |      |       |      |      |      |      |       |       |      |       |       |       |       |       |      |      |      |      |       |      |       |
| Cin_M9 | 0.07 | 0.15  | 0.25 | 0.22 | 0.49 | 0.23 | 0.35  | 0.03  | 0.31 | 0.18  | 0.30  | 0.55  | 0.22  | 0.28  | 0.09 | 0.35 | 0.79 | 0.31 | 0.13  | 0.53 | -0.84 |
| -      |      |       |      |      |      |      |       |       |      |       |       |       |       |       |      |      |      |      |       |      |       |
| Cin_M6 | 0.27 | 0.58  | 0.18 | 0.44 | 0.34 | 0.34 | 0.12  | 0.04  | 0.16 | 0.25  | 0.21  | 0.25  | 0.76  | 0.23  | 0.25 | 0.31 | 0.21 | 0.14 | 0.42  | 0.10 | -1.15 |
| +      |      |       |      |      |      |      |       |       |      |       |       |       |       |       |      |      |      |      |       |      |       |
| Cin_M6 | 0.21 | 0.15  | 0.10 | 0.16 | 0.19 | 0.45 | 0.46  | 0.13  | 0.37 | 0.22  | 0.31  | 0.61  | 0.31  | 0.46  | 0.26 | 0.18 | 0.37 | 0.22 | 0.29  | 0.11 | -1.08 |
| +      |      |       |      |      |      |      |       |       |      |       |       |       |       |       |      |      |      |      |       |      |       |
| Cin_M8 | 0.45 | 0.09  | 0.14 | 0.09 | 0.29 | 0.39 | 0.12  | -0.03 | 0.42 | 0.37  | 0.63  | 0.55  | 0.38  | 0.39  | 0.14 | 0.13 | 0.07 | 0.07 | -0.04 | 0.30 | -0.73 |
| +      |      |       |      |      |      |      |       |       |      |       |       |       |       |       |      |      |      |      |       |      |       |
| Cin_M8 | 0.53 | 0.47  | 0.29 | 0.54 | 0.34 | 0.21 | 0.27  | 0.49  | 0.24 | 0.36  | -0.32 | -0.46 | 0.27  | -0.23 | 0.23 | 0.71 | 0.38 | 0.39 | 0.15  | 0.36 | -1.06 |
| -      |      |       |      |      |      |      |       |       |      |       |       |       |       |       |      |      |      |      |       |      |       |
| start  | 0.41 | -0.17 | 0.02 | 0.15 | 0.26 | 0.30 | -0.15 | -0.20 | 0.52 | -0.09 | 0.34  | 0.36  | -0.07 | -0.02 | 0.35 | 0.30 | 0.42 | 0.42 | 0.25  | 0.11 | -1.21 |

Distal region LLR values

|        | Cin_M1 | Cin_M1 | Cin_M2 | Cin_M2 | Cin_M7 | Cin_M7 | Cin_M5 | Cin_M5 | Cin_M1 | Cin_M1 | Cin_M3 | Cin_M3 | Cin_M4 | Cin_M4 | Cin_M9 | Cin_M9 | Cin_M6 | Cin_M6 | Cin_M8 | Cin_M8 | end   |  |
|--------|--------|--------|--------|--------|--------|--------|--------|--------|--------|--------|--------|--------|--------|--------|--------|--------|--------|--------|--------|--------|-------|--|
|        | +      | -      | +      | -      | +      | -      | +      | -      | 0+     | 0-     | +      | -      | +      | -      | +      | -      | +      | -      | +      | -      |       |  |
| Cin_M1 | -0.58  | -0.06  | 0.17   | 0.27   | 0.15   | 0.40   | 0.05   | 0.03   | 0.05   | 0.04   | 0.36   | 0.34   | 0.11   | 0.44   | 0.16   | 0.04   | 0.32   | 0.21   | 0.32   | -0.01  | -0.82 |  |
| +      |        |        |        |        |        |        |        |        |        |        |        |        |        |        |        |        |        |        |        |        |       |  |
| Cin_M1 | -0.71  | -0.28  | 0.13   | 0.33   | 0.23   | 0.10   | 0.34   | 0.04   | 0.47   | 0.20   | 0.42   | 0.27   | 0.38   | 0.13   | 0.03   | 0.06   | 0.12   | -0.07  | 0.15   | 0.43   | -0.48 |  |
| -      |        |        |        |        |        |        |        |        |        |        |        |        |        |        |        |        |        |        |        |        |       |  |
| Cin_M2 | -0.18  | -0.23  | 0.29   | 0.08   | -0.05  | -0.11  | 0.05   | 0.08   | 0.18   | -0.11  | 0.43   | 0.34   | 0.22   | 0.01   | 0.28   | -0.16  | -0.07  | 0.35   | 0.11   | -0.25  | -0.49 |  |
| +      |        |        |        |        |        |        |        |        |        |        |        |        |        |        |        |        |        |        |        |        |       |  |
| Cin_M2 | -0.04  | 0.00   | 0.04   | 0.13   | 0.17   | 0.13   | -0.04  | -0.05  | 0.10   | 0.16   | 0.16   | 0.16   | 0.24   | 0.24   | 0.15   | 0.10   | 0.30   | 0.01   | 0.18   | 0.24   | -0.76 |  |
| -      |        |        |        |        |        |        |        |        |        |        |        |        |        |        |        |        |        |        |        |        |       |  |
| Cin_M7 | -0.14  | -0.13  | 0.33   | 0.10   | -0.07  | 0.30   | -0.13  | -0.07  | 0.28   | 0.00   | 0.32   | 0.15   | 0.07   | 0.25   | 0.02   | -0.07  | 0.13   | 0.24   | 0.05   | -0.10  | -0.33 |  |
| +      |        |        |        |        |        |        |        |        |        |        |        |        |        |        |        |        |        |        |        |        |       |  |
| Cin_M7 | -0.15  | -0.16  | 0.53   | 0.21   | 0.05   | 0.03   | -0.09  | -0.18  | -0.06  | -0.01  | 0.01   | 0.34   | 0.35   | 0.29   | -0.06  | -0.04  | 0.14   | -0.01  | 0.03   | -0.14  | -0.19 |  |
| -      |        |        |        |        |        |        |        |        |        |        |        |        |        |        |        |        |        |        |        |        |       |  |
| Cin_M5 | -0.27  | -0.21  | 0.51   | 0.06   | 0.13   | -0.03  | 0.16   | -0.15  | 0.43   | -0.04  | 0.61   | 0.07   | 0.11   | 0.21   | -0.21  | -0.10  | 0.01   | 0.26   | -0.13  | 0.05   | -0.55 |  |
| +      |        |        |        |        |        |        |        |        |        |        |        |        |        |        |        |        |        |        |        |        |       |  |
| Cin_M5 | -0.01  | 0.25   | 0.06   | 0.25   | 0.15   | 0.08   | 0.03   | 0.04   | -0.02  | 0.02   | 0.52   | 0.29   | 0.05   | 0.05   | 0.28   | -0.09  | 0.17   | 0.14   | 0.12   | -0.13  | -0.58 |  |
| -      |        |        |        |        |        |        |        |        |        |        |        |        |        |        |        |        |        |        |        |        |       |  |
| Cin_M1 | 0.20   | -0.10  | 0.01   | 0.12   | 0.02   | 0.08   | -0.05  | -0.09  | 0.21   | -0.03  | 0.15   | 0.22   | 0.03   | 0.13   | -0.02  | 0.21   | 0.49   | 0.29   | 0.35   | 0.16   | -0.66 |  |
| 0+     |        |        |        |        |        |        |        |        |        |        |        |        |        |        |        |        |        |        |        |        |       |  |
| Cin_M1 | -0.10  | -0.07  | 0.07   | 0.23   | 0.17   | 0.05   | 0.30   | 0.04   | 0.03   | -0.05  | 0.21   | 0.27   | 0.00   | 0.43   | 0.29   | 0.20   | 0.17   | 0.18   | 0.09   | 0.04   | -0.87 |  |
| 0-     |        |        |        |        |        |        |        |        |        |        |        |        |        |        |        |        |        |        |        |        |       |  |
| Cin_M3 | 0.12   | 0.08   | 0.18   | 0.49   | 0.46   | 0.16   | 0.12   | 0.00   | 0.07   | 0.15   | -0.02  | 0.34   | 0.16   | 0.18   | 0.04   | 0.31   | 0.22   | 0.23   | -0.37  | 0.00   | -0.80 |  |
| +      |        |        |        |        |        |        |        |        |        |        |        |        |        |        |        |        |        |        |        |        |       |  |
| Cin_M3 | 0.25   | -0.03  | 0.31   | 0.10   | 0.24   | 0.01   | 0.06   | 0.04   | 0.35   | 0.12   | 0.11   | 0.09   | 0.04   | 0.22   | 0.05   | 0.07   | 0.25   | 0.18   | -0.07  | 0.19   | -0.84 |  |
| -      |        |        |        |        |        |        |        |        |        |        |        |        |        |        |        |        |        |        |        |        |       |  |
| Cin_M4 | -0.24  | 0.30   | 0.25   | 0.29   | 0.09   | 0.22   | 0.24   | -0.07  | -0.03  | 0.32   | 0.10   | 0.21   | -0.11  | 0.20   | -0.02  | 0.03   | 0.20   | 0.05   | -0.24  | 0.39   | -0.58 |  |
| +      |        |        |        |        |        |        |        |        |        |        |        |        |        |        |        |        |        |        |        |        |       |  |
| Cin_M4 | -0.05  | -0.07  | 0.08   | 0.17   | 0.36   | 0.16   | -0.03  | -0.11  | 0.10   | -0.03  | 0.26   | 0.54   | 0.10   | 0.02   | 0.36   | 0.27   | 0.25   | 0.05   | -0.03  | -0.10  | -0.59 |  |
| -      |        |        |        |        |        |        |        |        |        |        |        |        |        |        |        |        |        |        |        |        |       |  |
| Cin_M9 | 0.17   | 0.16   | 0.13   | 0.27   | 0.19   | 0.12   | -0.10  | 0.20   | 0.02   | -0.04  | 0.21   | 0.14   | 0.10   | 0.23   | 0.10   | 0.04   | 0.45   | 0.05   | 0.01   | 0.19   | -0.90 |  |
| +      |        |        |        |        |        |        |        |        |        |        |        |        |        |        |        |        |        |        |        |        |       |  |
| Cin_M9 | -0.09  | -0.07  | 0.41   | 0.24   | 0.11   | 0.12   | -0.06  | 0.17   | 0.07   | 0.08   | 0.17   | 0.32   | 0.14   | 0.21   | -0.02  | -0.14  | 0.26   | 0.15   | 0.04   | 0.01   | -0.39 |  |
| -      |        |        |        |        |        |        |        |        |        |        |        |        |        |        |        |        |        |        |        |        |       |  |
| Cin_M6 | -0.08  | 0.38   | 0.10   | 0.23   | 0.08   | 0.25   | 0.03   | -0.04  | 0.12   | 0.36   | 0.14   | 0.14   | 0.32   | 0.15   | -0.06  | 0.00   | 0.05   | -0.04  | 0.09   | 0.02   | -0.88 |  |
| +      |        |        |        |        |        |        |        |        |        |        |        |        |        |        |        |        |        |        |        |        |       |  |
| Cin_M6 | 0.02   | -0.15  | 0.19   | 0.09   | 0.53   | 0.42   | 0.27   | -0.07  | 0.21   | 0.01   | 0.17   | 0.21   | 0.11   | 0.04   | 0.04   | 0.04   | 0.14   | 0.02   | -0.03  | -0.16  | -0.89 |  |
| -      |        |        |        |        |        |        |        |        |        |        |        |        |        |        |        |        |        |        |        |        |       |  |
| Cin_M8 | -0.18  | -0.01  | -0.09  | 0.03   | 0.28   | 0.07   | 0.35   | -0.10  | -0.01  | 0.03   | 0.02   | 0.69   | -0.04  | 0.10   | 0.34   | 0.01   | 0.07   | 0.05   | -0.03  | 0.17   | -0.87 |  |
| +      |        |        |        |        |        |        |        |        |        |        |        |        |        |        |        |        |        |        |        |        |       |  |
| Cin_M8 | -0.06  | 0.30   | -0.11  | 0.15   | 0.56   | 0.40   | 0.52   | 0.07   | 0.12   | 0.42   | -0.50  | -0.21  | 0.39   | -0.06  | 0.02   | 0.08   | 0.23   | -0.10  | -0.14  | -0.10  | -0.79 |  |
| -      |        |        |        |        |        |        |        |        |        |        |        |        |        |        |        |        |        |        |        |        |       |  |
| start  | 0.14   | -0.30  | 0.32   | -0.02  | -0.18  | 0.36   | 0.40   | 0.14   | -0.18  | 0.03   | -0.04  | 0.30   | -0.18  | 0.19   | -0.27  | -0.24  | 0.27   | 0.30   | -0.18  | -0.29  | -0.62 |  |



## Section 5: Lists of Top Scoring Genes

In this section we show the top 100 scoring genes for both models. The rank, gene name/ID and transcript name/ID, and score (calculated as described in the main text) is given. For some genes a note is given. Notice how alternative transcripts of genes can have the same score in case their promoter region is the same. Alternative transcripts of input genes are all considered as input data. In the list of the *C. intestinalis* model the 4 genes that were experimentally verified by *in situ* hybridization are indicated as well.

*C. elegans* pharyngeal muscle promoter architecture model

| Rank | Sequence name | Transcript Name | Score | Note  |
|------|---------------|-----------------|-------|-------|
| 1    | F47G6.1       | F47G6.1         | 5.29  | input |
| 2    | C14A6.8       | C14A6.8         | 3.68  |       |
| 3    | Y38C1AB.1     | Y38C1AB.1       | 3.52  |       |
| 4    | Y38C1AB.5     | Y38C1AB.5       | 3.52  |       |
| 5    | W03F8.1       | W03F8.1.2       | 3.23  | input |
| 6    | W03F8.1       | W03F8.1.1       | 3.23  | input |
| 7    | C49F8.2       | C49F8.2         | 3.04  | input |
| 8    | Y41E3.13      | Y41E3.13        | 2.88  |       |
| 9    | F12F3.1       | F12F3.1a.2      | 2.87  | input |
| 10   | C18H2.2       | C18H2.2         | 2.81  |       |
| 11   | K11C4.5       | K11C4.5         | 2.79  | input |
| 12   | C46C2.5       | C46C2.5         | 2.54  |       |
| 13   | ZK1086.1      | ZK1086.1b       | 2.53  | input |
| 14   | ZK1086.1      | ZK1086.1a       | 2.53  | input |
| 15   | C36B7.7       | C36B7.7         | 2.48  | input |
| 16   | F40A3.7       | F40A3.7         | 2.39  |       |
| 17   | F46H5.3       | F46H5.3b.1      | 2.36  |       |
| 18   | F46H5.3       | F46H5.3b.2      | 2.36  |       |
| 19   | R11A5.2       | R11A5.2         | 2.35  | input |
| 20   | T06A10.4      | T06A10.4        | 2.34  |       |
| 21   | M03C11.4      | M03C11.4        | 2.34  |       |
| 22   | Y73B6A.1      | Y73B6A.1        | 2.32  |       |
| 23   | K12G11.1      | K12G11.1        | 2.30  |       |
| 24   | F32D1.5       | F32D1.5.2       | 2.25  |       |
| 25   | C09D1.1       | C09D1.1f        | 2.24  | input |
| 26   | C09D1.1       | C09D1.1e        | 2.24  | input |
| 27   | C09D1.1       | C09D1.1g        | 2.24  | input |
| 28   | C09D1.1       | C09D1.1a        | 2.24  | input |
| 29   | C09D1.1       | C09D1.1b        | 2.24  | input |
| 30   | Y24D9A.4      | Y24D9A.4a.2     | 2.23  |       |
| 31   | Y60A3A.5      | Y60A3A.5        | 2.23  |       |
| 32   | R02D5.6       | R02D5.6         | 2.23  |       |
| 33   | W03G9.1       | W03G9.1.2       | 2.16  |       |
| 34   | W03G9.1       | W03G9.1.1       | 2.16  |       |
| 35   | F18G5.5       | F18G5.5         | 2.12  |       |
| 36   | T24B8.4       | T24B8.4         | 2.06  |       |
| 37   | Y43F8B.12     | Y43F8B.12       | 2.06  |       |
| 38   | F21C3.6       | F21C3.6         | 2.06  |       |
| 39   | Y39B6A.1      | Y39B6A.1.2      | 2.06  |       |
| 40   | Y39B6A.1      | Y39B6A.1.1      | 2.06  |       |
| 41   | F46C5.4       | F46C5.4         | 2.04  |       |
| 42   | R90.1         | R90.1           | 2.02  |       |
| 43   | C03B8.3       | C03B8.3         | 2.02  |       |
| 44   | ZC247.1       | ZC247.1         | 2.00  |       |
| 45   | B0554.4       | B0554.4         | 1.99  |       |

|     |            |            |      |       |
|-----|------------|------------|------|-------|
| 46  | F25D7.5    | F25D7.5    | 1.95 |       |
| 47  | F52C9.8    | F52C9.8e   | 1.94 |       |
| 48  | C18B2.1    | C18B2.1    | 1.94 |       |
| 49  | K01A12.2   | K01A12.2   | 1.92 |       |
| 50  | T13C5.1    | T13C5.1a   | 1.91 |       |
| 51  | C06E1.1    | C06E1.1    | 1.91 |       |
| 52  | T05C1.2    | T05C1.2    | 1.90 |       |
| 53  | C25G6.3    | C25G6.3    | 1.90 |       |
| 54  | F44A6.1    | F44A6.1b   | 1.89 | input |
| 55  | F44A6.1    | F44A6.1a   | 1.89 | input |
| 56  | F32H2.5    | F32H2.5    | 1.87 |       |
| 57  | F13H8.9    | F13H8.9    | 1.87 |       |
| 58  | C48C5.3    | C48C5.3    | 1.86 |       |
| 59  | R09H3.1    | R09H3.1    | 1.84 |       |
| 60  | Y97E10AR.6 | Y97E10AR.6 | 1.83 |       |
| 61  | W03D2.6    | W03D2.6    | 1.81 |       |
| 62  | K09E3.5    | K09E3.5    | 1.80 |       |
| 63  | C17F3.1    | C17F3.1    | 1.80 |       |
| 64  | F36F12.3   | F36F12.3   | 1.80 |       |
| 65  | C08G5.2    | C08G5.2    | 1.78 |       |
| 66  | F13D12.6   | F13D12.6.1 | 1.78 |       |
| 67  | F13D12.6   | F13D12.6.2 | 1.78 |       |
| 68  | F25H8.6    | F25H8.6    | 1.78 |       |
| 69  | M01D7.7    | M01D7.7b   | 1.76 | input |
| 70  | K02B2.6    | K02B2.6    | 1.75 |       |
| 71  | Y47G6A.15  | Y47G6A.15b | 1.74 |       |
| 72  | D1081.2    | D1081.2    | 1.73 |       |
| 73  | H32C10.2   | H32C10.2   | 1.72 |       |
| 74  | M02A10.2   | M02A10.2   | 1.72 |       |
| 75  | F22B7.9    | F22B7.9    | 1.71 |       |
| 76  | C54F6.6    | C54F6.6    | 1.71 |       |
| 77  | T20H4.5    | T20H4.5.2  | 1.71 |       |
| 78  | T20H4.5    | T20H4.5.1  | 1.71 |       |
| 79  | C53C11.3   | C53C11.3   | 1.69 |       |
| 80  | F10E9.6    | F10E9.6a.1 | 1.68 |       |
| 81  | F10E9.6    | F10E9.6a.2 | 1.68 |       |
| 82  | C06G4.4    | C06G4.4    | 1.68 |       |
| 83  | ZK652.8    | ZK652.8    | 1.66 |       |
| 84  | C36E6.5    | C36E6.5.2  | 1.63 |       |
| 85  | C36E6.5    | C36E6.5.1  | 1.63 |       |
| 86  | R07B1.1    | R07B1.1    | 1.63 |       |
| 87  | Y53C12B.5  | Y53C12B.5b | 1.63 |       |
| 88  | Y37E11AL.9 | Y37E11AL.9 | 1.63 |       |
| 89  | C32E8.11   | C32E8.11   | 1.62 |       |
| 90  | F13B12.5   | F13B12.5   | 1.62 |       |
| 91  | Y69A2AR.9  | Y69A2AR.9  | 1.62 |       |
| 92  | Y51A2A.1   | Y51A2A.1   | 1.59 |       |
| 93  | H22D14.1   | H22D14.1   | 1.59 |       |
| 94  | E04F6.6    | E04F6.6    | 1.58 |       |
| 95  | F55A11.6   | F55A11.6b  | 1.58 |       |
| 96  | F26B1.7    | F26B1.7    | 1.58 |       |
| 97  | Y65B4BL.1  | Y65B4BL.1  | 1.58 |       |
| 98  | C04G2.10   | C04G2.10   | 1.57 |       |
| 99  | C36B7.1    | C36B7.1    | 1.57 |       |
| 100 | Y48G1C.12  | Y48G1C.12  | 1.57 |       |

*C. intestinalis* muscle specific promoter model architecture model

| Rank | Gene ID            | Transcript ID       | Score | Note                     |
|------|--------------------|---------------------|-------|--------------------------|
| 1    | ENSCING00000007550 | ENSCINT00000015480  | 7.03  | input Ci-MA1             |
| 2    | ENSCING00000007219 | ENSCINT00000014813  | 6.21  | input Ci-MRLC4           |
| 3    | ENSCING00000009772 | ENSCINT00000019903  | 6.19  | similar to input Ci-MRL4 |
| 4    | ENSCING00000009772 | ENSCINT00000019909  | 6.19  | input Ci-MHC4            |
| 5    | ENSCING00000009772 | ENSCINT00000019905  | 5.74  | similar to input Ci-MHC4 |
| 6    | ENSCING00000004818 | ENSCINT00000009977  | 4.90  | input Ci-MLC4            |
| 7    | ENSCING00000004811 | ENSCINT00000009959  | 4.55  | input Ci-MLC3            |
| 8    | ENSCING00000002068 | ENSCINT00000004215  | 4.32  | input Ci-MA2             |
| 9    | ENSCING00000004811 | ENSCINT00000009951  | 3.91  | input Ci-MLC2            |
| 10   | ENSCING00000012638 | ENSCINT00000017888  | 3.70  | similar to input Ci-MA4  |
| 11   | ENSCING00000012638 | ENSCINT00000014519  | 3.70  | input Ci-MA4             |
| 12   | ENSCING00000002749 | ENSCINT00000005614  | 3.69  | input Ci-MRLC2           |
| 13   | ENSCING00000002749 | ENSCINT000000024572 | 3.26  | input Ci-MRLC3           |
| 14   | ENSCING00000001218 | ENSCINT00000002395  | 3.06  | similar to input Ci-MHC2 |
| 15   | ENSCING00000001218 | ENSCINT00000002399  | 3.06  | input Ci-MHC2            |
| 16   | ENSCING00000001218 | ENSCINT00000002389  | 3.06  | similar to input Ci-MHC2 |
| 17   | ENSCING00000004282 | ENSCINT00000008881  | 3.01  | input Ci-TPM3            |
| 18   | ENSCING00000006130 | ENSCINT00000017917  | 2.78  |                          |
| 19   | ENSCING00000006130 | ENSCINT00000012677  | 2.74  |                          |
| 20   | ENSCING00000014374 | ENSCINT00000026270  | 2.51  | tested by ISH            |
| 21   | ENSCING00000005333 | ENSCINT00000010963  | 2.45  | input Ci-TnT             |
| 22   | ENSCING00000005333 | ENSCINT00000024866  | 2.45  | similar to input Ci-TnT  |
| 23   | ENSCING00000004818 | ENSCINT00000009978  | 2.14  | similar to input Ci-MLC4 |
| 24   | ENSCING00000015577 | ENSCINT00000027760  | 2.01  |                          |
| 25   | ENSCING00000013146 | ENSCINT00000024481  | 1.99  |                          |
| 26   | ENSCING0000001377  | ENSCINT00000002686  | 1.98  | input Ci-MA5             |
| 27   | ENSCING00000011503 | ENSCINT00000022194  | 1.92  |                          |
| 28   | ENSCING00000011776 | ENSCINT00000022592  | 1.89  |                          |
| 29   | ENSCING00000004103 | ENSCINT00000022966  | 1.83  |                          |
| 30   | ENSCING00000017023 | ENSCINT00000029353  | 1.80  |                          |
| 31   | ENSCING00000003268 | ENSCINT00000006714  | 1.72  | tested by ISH            |
| 32   | ENSCING00000004994 | ENSCINT00000010274  | 1.72  |                          |
| 33   | ENSCING00000002305 | ENSCINT00000004703  | 1.70  |                          |
| 34   | ENSCING00000002305 | ENSCINT00000024273  | 1.70  |                          |
| 35   | ENSCING00000015038 | ENSCINT00000027164  | 1.70  |                          |
| 36   | ENSCING00000014058 | ENSCINT00000025813  | 1.63  |                          |
| 37   | ENSCING00000010768 | ENSCINT00000009260  | 1.61  |                          |
| 38   | ENSCING00000000960 | ENSCINT00000001733  | 1.58  |                          |
| 39   | ENSCING00000009408 | ENSCINT00000019138  | 1.56  |                          |
| 40   | ENSCING00000008083 | ENSCINT00000016536  | 1.55  |                          |
| 41   | ENSCING00000003631 | ENSCINT00000007469  | 1.55  | tested by ISH            |
| 42   | ENSCING00000006130 | ENSCINT00000023457  | 1.53  |                          |
| 43   | ENSCING00000013183 | ENSCINT00000024546  | 1.53  |                          |
| 44   | ENSCING00000000583 | ENSCINT00000001070  | 1.51  |                          |
| 45   | ENSCING00000004434 | ENSCINT00000009154  | 1.48  |                          |
| 46   | ENSCING00000005715 | ENSCINT00000011803  | 1.46  |                          |
| 47   | ENSCING00000014525 | ENSCINT00000018109  | 1.44  |                          |
| 48   | ENSCING00000016494 | ENSCINT00000028789  | 1.43  |                          |
| 49   | ENSCING00000012527 | ENSCINT00000023589  | 1.41  |                          |
| 50   | ENSCING00000003992 | ENSCINT00000008325  | 1.41  | tested by ISH            |
| 51   | ENSCING00000005571 | ENSCINT00000011559  | 1.40  |                          |
| 52   | ENSCING00000011769 | ENSCINT00000022587  | 1.38  |                          |
| 53   | ENSCING00000007847 | ENSCINT00000016086  | 1.37  |                          |
| 54   | ENSCING00000002349 | ENSCINT00000004783  | 1.36  | input TPM1               |

|     |                    |                    |      |                          |
|-----|--------------------|--------------------|------|--------------------------|
| 55  | ENSCING00000017243 | ENSCINT00000009056 | 1.36 | similar to input Ci-TPM1 |
| 56  | ENSCING00000017243 | ENSCINT00000009054 | 1.36 | similar to input Ci-TPM1 |
| 57  | ENSCING00000016534 | ENSCINT00000028828 | 1.36 |                          |
| 58  | ENSCING00000007682 | ENSCINT00000015757 | 1.35 |                          |
| 59  | ENSCING00000006235 | ENSCINT00000012854 | 1.33 | input Ci-TnC2            |
| 60  | ENSCING00000002478 | ENSCINT00000005015 | 1.30 |                          |
| 61  | ENSCING00000000231 | ENSCINT00000000411 | 1.29 |                          |
| 62  | ENSCING00000006972 | ENSCINT00000014308 | 1.29 |                          |
| 63  | ENSCING00000003092 | ENSCINT00000009429 | 1.28 |                          |
| 64  | ENSCING00000014909 | ENSCINT00000010165 | 1.28 |                          |
| 65  | ENSCING00000015814 | ENSCINT00000005395 | 1.23 |                          |
| 66  | ENSCING00000016759 | ENSCINT00000029082 | 1.22 |                          |
| 67  | ENSCING00000015195 | ENSCINT00000027332 | 1.22 |                          |
| 68  | ENSCING00000007638 | ENSCINT00000015655 | 1.21 |                          |
| 69  | ENSCING00000009244 | ENSCINT00000018782 | 1.21 |                          |
| 70  | ENSCING00000007031 | ENSCINT00000022807 | 1.20 |                          |
| 71  | ENSCING00000014877 | ENSCINT00000026958 | 1.18 |                          |
| 72  | ENSCING00000001706 | ENSCINT00000003438 | 1.18 |                          |
| 73  | ENSCING00000015680 | ENSCINT00000027867 | 1.16 |                          |
| 74  | ENSCING00000012882 | ENSCINT00000024108 | 1.14 |                          |
| 75  | ENSCING00000008148 | ENSCINT00000016638 | 1.12 |                          |
| 76  | ENSCING00000008082 | ENSCINT00000016530 | 1.11 |                          |
| 77  | ENSCING00000009410 | ENSCINT00000019143 | 1.11 |                          |
| 78  | ENSCING00000008422 | ENSCINT00000017161 | 1.10 |                          |
| 79  | ENSCING00000006339 | ENSCINT00000013066 | 1.10 |                          |
| 80  | ENSCING00000006339 | ENSCINT00000025838 | 1.10 |                          |
| 81  | ENSCING00000006339 | ENSCINT00000025839 | 1.10 |                          |
| 82  | ENSCING00000010210 | ENSCINT00000020348 | 1.09 |                          |
| 83  | ENSCING00000016710 | ENSCINT00000029027 | 1.08 |                          |
| 84  | ENSCING00000001030 | ENSCINT00000023342 | 1.08 |                          |
| 85  | ENSCING00000009771 | ENSCINT00000028021 | 1.07 |                          |
| 86  | ENSCING00000009745 | ENSCINT00000019797 | 1.07 |                          |
| 87  | ENSCING00000009556 | ENSCINT00000019441 | 1.06 |                          |
| 88  | ENSCING00000009483 | ENSCINT00000019315 | 1.05 |                          |
| 89  | ENSCING00000004449 | ENSCINT00000009192 | 1.05 |                          |
| 90  | ENSCING00000005640 | ENSCINT00000011687 | 1.04 |                          |
| 91  | ENSCING00000006115 | ENSCINT00000012634 | 1.04 |                          |
| 92  | ENSCING00000005361 | ENSCINT00000011013 | 1.04 |                          |
| 93  | ENSCING00000005361 | ENSCINT00000004019 | 1.04 |                          |
| 94  | ENSCING00000016259 | ENSCINT00000006242 | 1.03 |                          |
| 95  | ENSCING00000014032 | ENSCINT00000009663 | 1.03 |                          |
| 96  | ENSCING00000013643 | ENSCINT00000025207 | 1.03 |                          |
| 97  | ENSCING00000005896 | ENSCINT00000012192 | 1.02 |                          |
| 98  | ENSCING00000014797 | ENSCINT00000026832 | 1.00 |                          |
| 99  | ENSCING00000006856 | ENSCINT00000014081 | 1.00 |                          |
| 100 | ENSCING00000011462 | ENSCINT00000022134 | 0.99 |                          |

## References

1. Bailey, T. L. and Elkan, C., 1994, Fitting a mixture model by expectation maximization to discover motifs in biopolymers, *Proc Int Conf Intell Syst Mol Biol*, 2, 28-36.
2. Pavesi, G., Mauri, G. and Pesole, G., 2001, An algorithm for finding signals of unknown length in DNA sequences, *Bioinformatics*, 17 Suppl 1, S207-14.
3. Hughes, J. D., Estep, P. W., Tavazoie, S. and Church, G. M., 2000, Computational identification of cis-regulatory elements associated with groups of functionally related genes in *Saccharomyces cerevisiae*, *J Mol Biol*, 296, 1205-14.
